# Supplementary material for: A Generic Force Field for Protein Coarse-Grained Molecular Dynamics Simulation
Source: Int J Mol Sci. 2012 Nov 8;13(11):14451–69. doi: 10.3390/ijms131114451 (PMC3509591; doi:10.3390/ijms131114451)
Supplement: Supplementary file 1 [file ijms-13-14451-s001.pdf]

## Supplementary Information

**Table S1.** The Gaussian parameters for the bending and torsion energy potentials.

$B$  denotes the backbone bead, and  $S_i$  denotes the side-chain bead.

|       | $B-B-B$             | $B-B-S_i$             | $S_i-B-B$           | $B-B-B-B$           | $B-B-B-S_i$         | $S_i-B-B-B$         | $S_i-B-B-S_j$       |
|-------|---------------------|-----------------------|---------------------|---------------------|---------------------|---------------------|---------------------|
| $a_1$ | $3.07 \times 10^2$  | $6.56 \times 10^0$    | $0.00 \times 10^0$  | $4.79 \times 10^1$  | $6.36 \times 10^1$  | $5.76 \times 10^1$  | $1.95 \times 10^1$  |
| $b_1$ | $-1.50 \times 10^0$ | $4.43 \times 10^0$    | $0.00 \times 10^0$  | $-2.74 \times 10^1$ | $2.07 \times 10^2$  | $-8.28 \times 10^1$ | $-5.57 \times 10^1$ |
| $c_1$ | $5.04 \times 10^1$  | $6.34 \times 10^0$    | $0.00 \times 10^0$  | $6.37 \times 10^1$  | $2.24 \times 10^2$  | $1.15 \times 10^2$  | $5.77 \times 10^1$  |
| $a_2$ | $-8.43 \times 10^2$ | $1.46 \times 10^1$    | $2.46 \times 10^2$  | $1.64 \times 10^1$  | $6.20 \times 10^1$  | $5.66 \times 10^1$  | $1.80 \times 10^1$  |
| $b_2$ | $5.79 \times 10^1$  | $1.30 \times 10^2$    | $-2.33 \times 10^1$ | $2.21 \times 10^1$  | $-2.01 \times 10^2$ | $1.18 \times 10^2$  | $1.40 \times 10^2$  |
| $c_2$ | $2.58 \times 10^1$  | $1.23 \times 10^1$    | $7.63 \times 10^1$  | $2.10 \times 10^1$  | $9.96 \times 10^1$  | $7.97 \times 10^1$  | $5.88 \times 10^1$  |
| $a_3$ | $2.48 \times 10^1$  | $3.17 \times 10^0$    | $8.15 \times 10^0$  | $3.93 \times 10^1$  | $2.31 \times 10^1$  | $1.55 \times 10^0$  | $4.05 \times 10^1$  |
| $b_3$ | $1.04 \times 10^2$  | $3.58 \times 10^1$    | $5.64 \times 10^1$  | $-1.55 \times 10^2$ | $-3.36 \times 10^1$ | $3.08 \times 10^1$  | $-1.95 \times 10^2$ |
| $c_3$ | $1.53 \times 10^1$  | $7.85 \times 10^0$    | $5.73 \times 10^0$  | $1.30 \times 10^2$  | $5.52 \times 10^1$  | $2.09 \times 10^1$  | $7.28 \times 10^2$  |
| $a_4$ | $-2.16 \times 10^2$ | $2.25 \times 10^2$    | $4.38 \times 10^2$  | $5.37 \times 10^1$  | $0.00 \times 10^0$  | $0.00 \times 10^0$  | $0.00 \times 10^0$  |
| $b_4$ | $5.65 \times 10^1$  | $-1.69 \times 10^1$   | $3.35 \times 10^2$  | $1.42 \times 10^2$  | $0.00 \times 10^0$  | $0.00 \times 10^0$  | $0.00 \times 10^0$  |
| $c_4$ | $1.80 \times 10^1$  | $7.75 \times 10^1$    | $1.14 \times 10^2$  | $6.81 \times 10^1$  | $0.00 \times 10^0$  | $0.00 \times 10^0$  | $0.00 \times 10^0$  |
| $a_5$ | $1.98 \times 10^2$  | $7.36 \times 10^{15}$ | $1.42 \times 10^1$  | $2.35 \times 10^1$  | $0.00 \times 10^0$  | $0.00 \times 10^0$  | $0.00 \times 10^0$  |
| $b_5$ | $2.25 \times 10^2$  | $1.70 \times 10^3$    | $1.17 \times 10^2$  | $8.20 \times 10^1$  | $0.00 \times 10^0$  | $0.00 \times 10^0$  | $0.00 \times 10^0$  |
| $c_5$ | $6.72 \times 10^1$  | $2.69 \times 10^2$    | $1.84 \times 10^1$  | $2.42 \times 10^1$  | $0.00 \times 10^0$  | $0.00 \times 10^0$  | $0.00 \times 10^0$  |
| $a_6$ | $1.11 \times 10^3$  | $0.00 \times 10^0$    | $0.00 \times 10^0$  | $0.00 \times 10^0$  | $0.00 \times 10^0$  | $0.00 \times 10^0$  | $0.00 \times 10^0$  |
| $b_6$ | $5.77 \times 10^1$  | $0.00 \times 10^0$    | $0.00 \times 10^0$  | $0.00 \times 10^0$  | $0.00 \times 10^0$  | $0.00 \times 10^0$  | $0.00 \times 10^0$  |
| $c_6$ | $2.40 \times 10^1$  | $0.00 \times 10^0$    | $0.00 \times 10^0$  | $0.00 \times 10^0$  | $0.00 \times 10^0$  | $0.00 \times 10^0$  | $0.00 \times 10^0$  |

© 2012 by the authors; licensee MDPI, Basel, Switzerland. This article is an open access article distributed under the terms and conditions of the Creative Commons Attribution license (<http://creativecommons.org/licenses/by/3.0/>).
